# Supplementary material
Source: MDPI journal article supplement (https://www.mdpi.com/2073-4344/10/4/447)
Supplement: s1 [file s1]

# Electronic Supporting Information

## Positive Impact of Natural Deep Eutectic Solvents on the Biocatalytic Performance of 5-Hydroxymethyl Furfural Oxidase

Gonzalo de Gonzalo,<sup>1,\*</sup> Caterina Martin<sup>2</sup> and Marco W. Fraaije<sup>2,\*</sup>

<sup>1</sup> Departamento de Química Orgánica, Universidad de Sevilla, c/ Profesor García González 1, 41012, Sevilla, Spain. Mail: [gdegonzalo@us.es](mailto:gdegonzalo@us.es). Phone: +34 954559997

<sup>2</sup> Groningen Biomolecular Sciences and Biotechnology Institute, University of Groningen, Nijenborgh 4, 9747, AG Groningen, The Netherlands. Mail: [m.w.fraaije@rug.nl](mailto:m.w.fraaije@rug.nl). Phone: +31 503634345

1. Gas chromatography analyses.
2. HPLC analyses.
3. General procedure for the HMF oxidation catalysed by HMFO in presence of DES.

## 1. Gas chromatography analyses

GC/MS analysis for compounds **1–12** were performed on a GC Hewlett Packard 6890 Series II and MS Hewlett Packard 5973 chromatograph (Agilent Technologies) equipped with HP-5 cross-linked methyl siloxane column (30 m × 0.32 mm × 0.25 µm, 1.0 bar N<sub>2</sub>). The injector temperature was 225 °C and the FID temperature was 250 °C. The temperature program performed for all the substrates was: 50°C/ 5 min/ 10°C/min/ 200°C/ 2 min. Conversions were determined by GC/MS by performing a calibration of the substrates and the products at different concentrations, in order to obtain the response of each compound to the detector and then make the calculations with these values

**Table S1.** Retention times at GC/MS analyses in the biooxidations of alcohols **1-12a**.

| Compound  | <i>t<sub>R</sub></i> a (min) | <i>t<sub>R</sub></i> b (min) |
|-----------|------------------------------|------------------------------|
| <b>1</b>  | 9.9                          | 8.1                          |
| <b>2</b>  | 14.6                         | 12.9                         |
| <b>3</b>  | 20.6                         | 19.5                         |
| <b>4</b>  | 17.2                         | 14.7                         |
| <b>5</b>  | 13.4                         | 11.5                         |
| <b>6</b>  | 17.2                         | 15.1                         |
| <b>7</b>  | 8.9                          | 8.2                          |
| <b>8</b>  | 18.1                         | 16.4                         |
| <b>9</b>  | 12.3                         | 10.7                         |
| <b>10</b> | 10.5                         | 9.3                          |
| <b>11</b> | 11.7                         | 10.2                         |
| <b>12</b> | 13.2                         | 13.9                         |

## 2. HPLC analyses

The optical purity of (*R*)-1-indanol (**12a**) was determined using a Thermo-Fischer UltiMate chromatograph equipped with a Thermo UltiMate detector. This compound was analysed employing a Chiralcel OD column (Daicel, 0.46 cm x 25 cm), 35°C, *n*-hexane/*i*-propanol 98:2, 1.0 mL/min: *t<sub>R</sub>* (*S*)= 15.2 min; *t<sub>R</sub>* (*R*)= 17.5 min.

The products formed by HMFO using **13a** as a substrate were analysed using an HPLC Jasco MD-2010 Plus, equipped with a Zorbax Eclipse XDB-C8 column, 5 µm (Agilent). The mobile phase used was 12 mM phosphate buffer pH 7.0 (A) and

acetonitrile (B) at a flow rate of 1.2 mL/min. After 1 min 100% A, B was increased to 5 % in 3.5 min and then to 40% in 2.5 min. After 0.5 min at 40% B, the eluent returned to 100% A in 0.5 min and this was maintained for 2 minutes. Detection was done at 268 nm. The retention times of **13a**, **13b** and **13c** were 6.4, 2.1 and 1.2 minutes respectively.

### 3. General procedure for the HMF oxidation catalysed by HMFO in presence of DES.

HMF (**13a**, 5 mM) were dissolved in the corresponding mixtures 50 mM Tris/HCl buffer pH 8.0/DES at different concentrations (1.0 mL), containing HMFO (2.0  $\mu$ M). Reactions were shaken at 220 rpm and 30°C for 24 hours. The reactions were stopped by incubation at 95°C for 10 min to inactivate the enzyme. Subsequently the reactions were centrifuged at 13.000 rpm for 10 min to remove the precipitated enzyme before HPLC analysis.

**Table S2.** Percentage of products formed during the oxidation of HMF catalysed by HMFO in Tris/HCl 50 mM pH 8.0 containing Glu:Fru:H<sub>2</sub>O (1:1:6).<sup>1</sup> Average values of two experiments.

| % Glu:Fru:H <sub>2</sub> O | % HMF ( <b>13a</b> ) <sup>2</sup> | % FFA ( <b>13b</b> ) <sup>2</sup> | % FDCA ( <b>13c</b> ) <sup>2</sup> |
|----------------------------|-----------------------------------|-----------------------------------|------------------------------------|
| None                       | ≤3.0                              | 84.4                              | 15.6                               |
| 30                         | ≤3.0                              | 69.2                              | 30.8                               |
| 60                         | ≤3.0                              | 75.0                              | 25.0                               |
| 90                         | 13.3                              | 78.2                              | 5.9                                |

<sup>1</sup> Average values for two experiments. <sup>2</sup> Determined by HPLC.
